# Supplementary material for: In situ Cosmogenic 10 Be and 26 Al in Deglacial Sediment Reveals Interglacial Exposure, Burial, and Limited Erosion Under the Quebec-Labrador Ice Dome
Source: Copernicus journal article supplement (doi:10.5194/egusphere-2024-2233), 2024-07-29

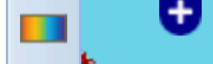

Select L

Map Legend

Data Unit: none

|                               |
|-------------------------------|
| 0.0 - 2.5833333333            |
| 2.5833333333 - 5.1666666666   |
| 5.1666666667 - 7.75           |
| 7.75 - 10.3333333333          |
| 10.3333333333 - 12.9166666666 |
| 12.9166666667 - 15.5          |
| 15.5 - 21.25                  |
| 21.25 - 27                    |
| 27 - 32.75                    |
| 32.75 - 38.5                  |
| 38.5 - 44.25                  |
| 44.25 - 50                    |

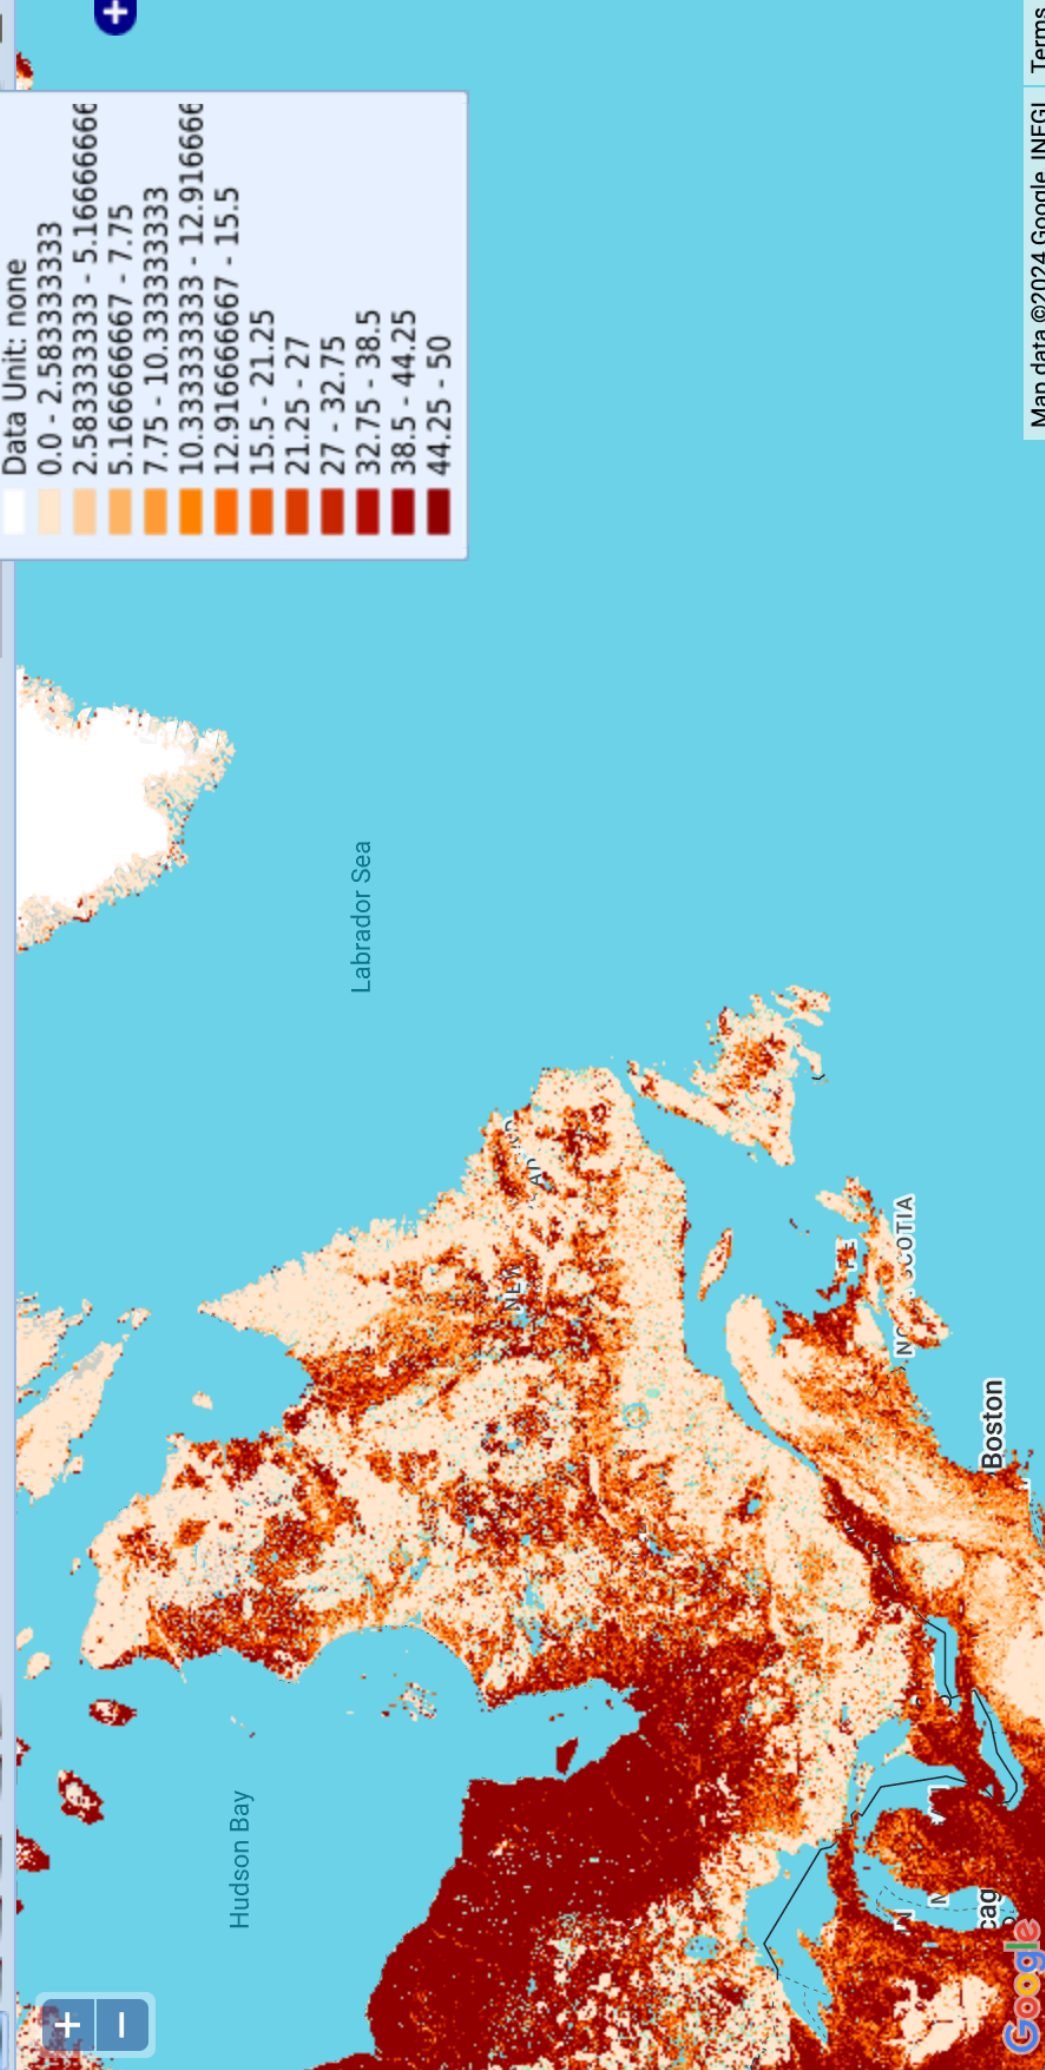

Supplement: Supplementary file [file egusphere-2024-2233-AC3-supplement.pdf]
